# Supplementary material
Source: PubMed Central journal article supplement (PMC5901906)
Supplement: NIHMS954569-supplement.pdf [file NIHMS954569-supplement.pdf]

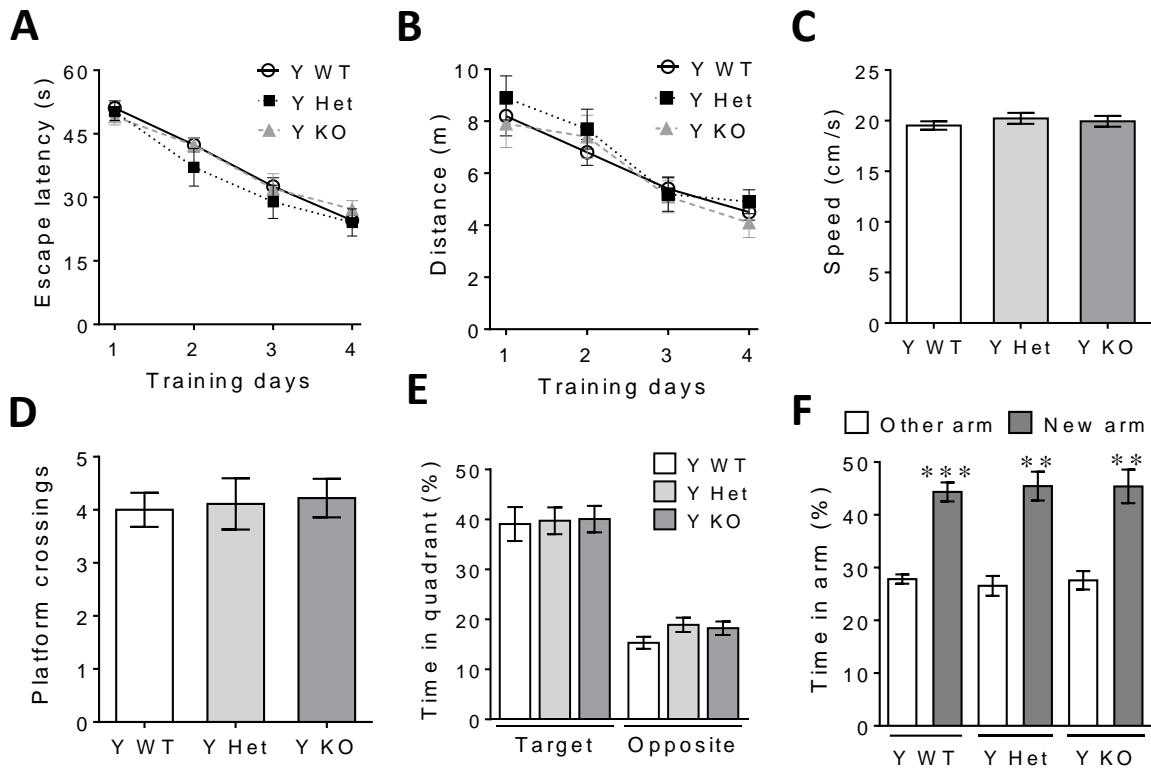

**Figure S1. Young adult STEP KO and Het mice showed similar performances compared to young WT mice in the MWM and Y-maze tasks. Related to Figure 1.** During the MWM task, no significant difference was observed in the latency (**A**) and path length (**B**) of young (Y; 6mo old) STEP KO (n=9), STEP Het (n=9), and WT mice (n=34) ( $P>0.05$ ; two-way ANOVA, Tukey's HSD test). During the MWM probe trial, speed (one-way ANOVA) (**C**), platform crossing (one-way ANOVA) (**D**), and time spent in the target and opposite quadrants (two-way ANOVA) (**E**) were not significantly different across all groups. (**F**) During the Y-maze, all groups spent more time in the new available arm than in the other arm previously explored during the training phase (\*\*  $P<0.01$ , \*\*\*  $P<0.001$ ; two-way ANOVA). All histograms are presented as mean values  $\pm$  s.e.m.

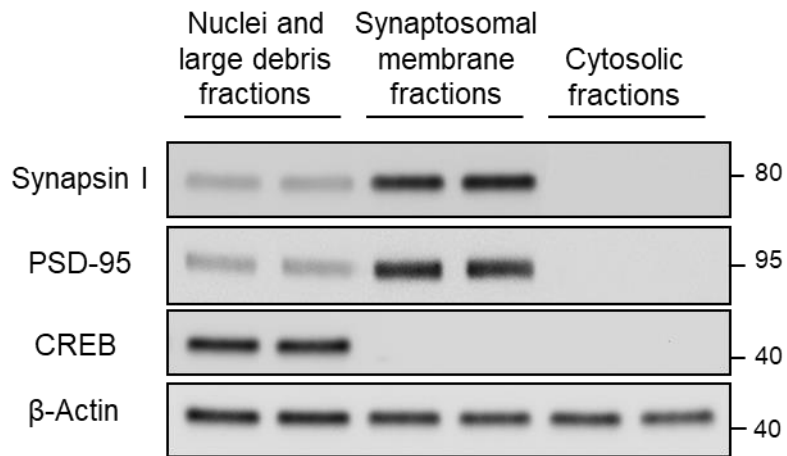

**Figure S2. The synaptosomal (P2) membrane fraction prepared from hippocampus is enriched in synaptic proteins. Related to Figure 1.** The different fractions were examined for levels of synapsin I and PSD-95 to confirm the enrichment of synaptic proteins in P2 fractions. The level of cAMP response element-binding (CREB), a nuclear protein, was also determined for comparison.

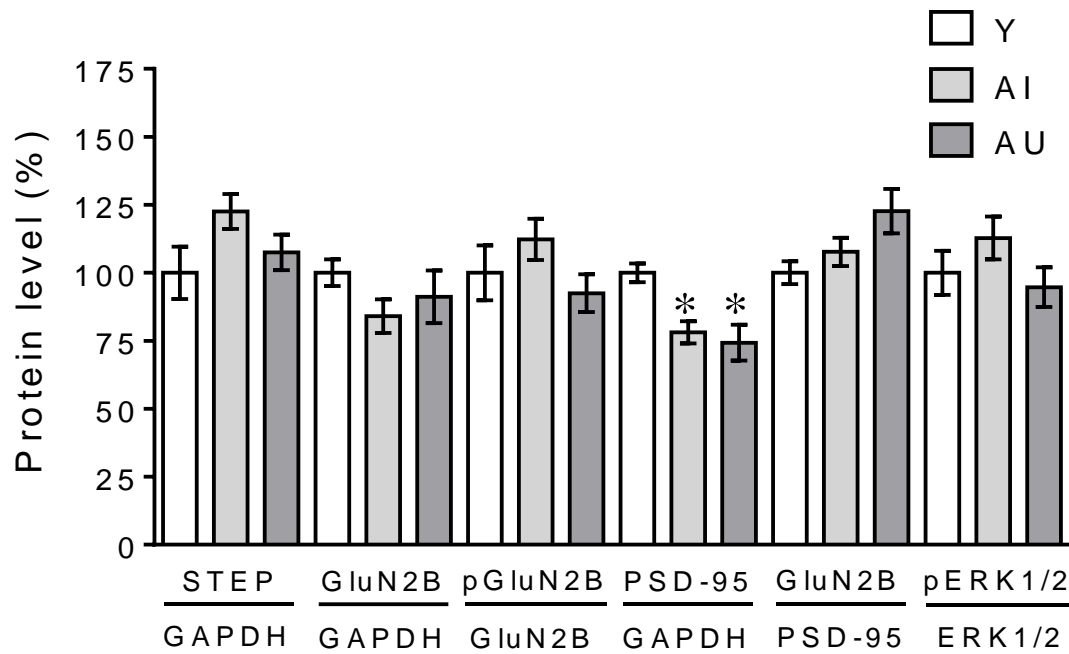

**Figure S3. Densitometric quantification of P2 fractions from the occipital cortex. Related to Figure 1.**

No significant difference in STEP levels and phosphorylation of GluN2B and ERK1/2 in young (Y; n=9) adult, aged memory-impaired (AI; n=9), and aged memory-unimpaired (AU; n=9) mice. \*  $P < 0.05$  indicates significant variations compared to Y mice (one-way ANOVA). The histogram is presented as mean values  $\pm$  s.e.m.

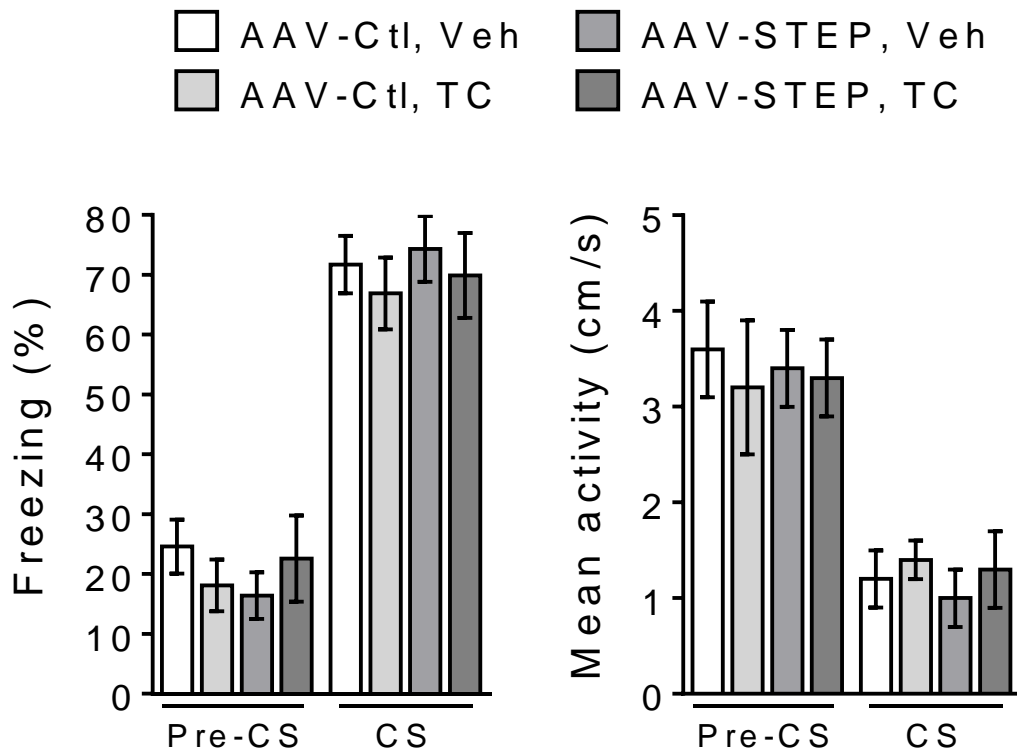

**Figure S4. Amygdala-dependent auditory-cued fear conditioning is not altered by hippocampal STEP overexpression. Related to Figure 2.** Tone-dependent memory test of mice injected with AAV-STEP or control (Ctl) AAV-EGFP in the CA1 region of dorsal hippocampus, and treated with TC-2153 (i.p., 10mg/kg) or vehicle (Veh; 0.1% DMSO, i.p., v/v) 3h before the training phase, where a tone (Conditioned stimulus, CS; 75dB SPL, 30s) was associated with a footshock (Unconditioned stimulus, US; 0.7mA, 2s). Twenty-four hours after training, mice were tested in a novel context to evaluate freezing and motor activity before (Pre-CS) and after (CS) auditory stimulation. AAV-STEP + Veh mice showed similar freezing and motor activity compared to the other groups after the tone ( $P>0.05$ ; three-way ANOVA;  $n=10$  in each group, two independent experiments). Histograms are presented as mean values  $\pm$  s.e.m.

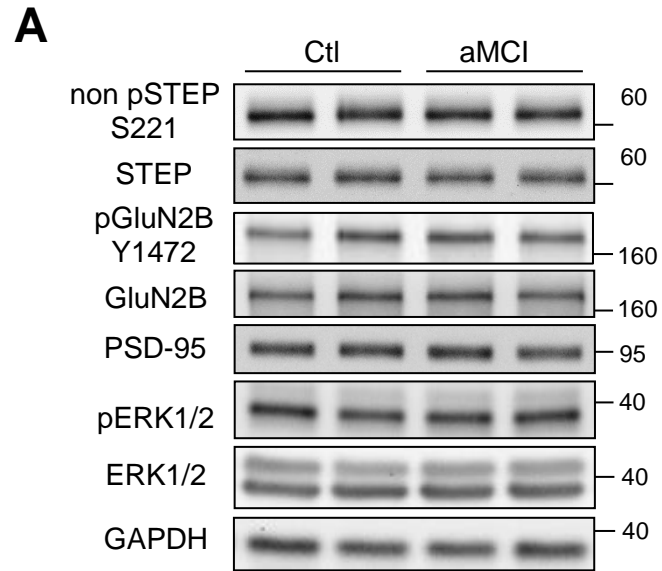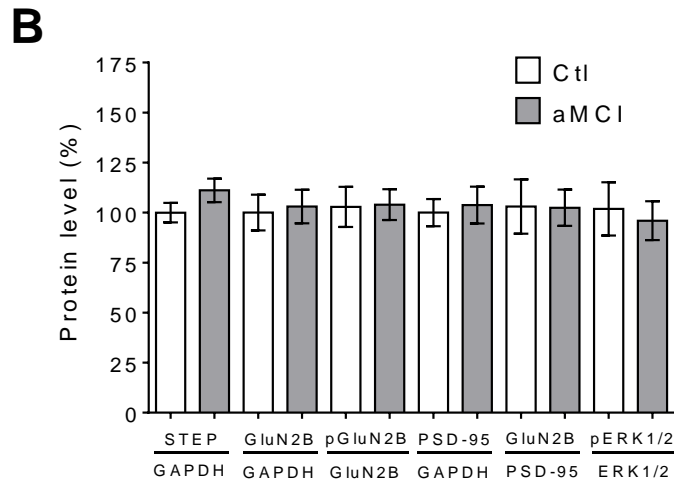

**Figure S5. Representative immunoblots (A) and densitometric quantification (B) revealed no significant difference in total and phosphorylated proteins obtained from synaptosomal fraction of the occipital cortex of aMCI patients (n=6) and control (Ctl) aged non-demented subjects (n=8). Related to Figure 5. The histogram is presented as mean values  $\pm$  s.e.m.**
